# Supplementary material for: Triplication of the interferon receptor locus contributes to hallmarks of Down syndrome in a mouse model
Source: PubMed Central journal article supplement (PMC10260402; doi:10.1038/s41588-023-01399-7), 2023-06-05

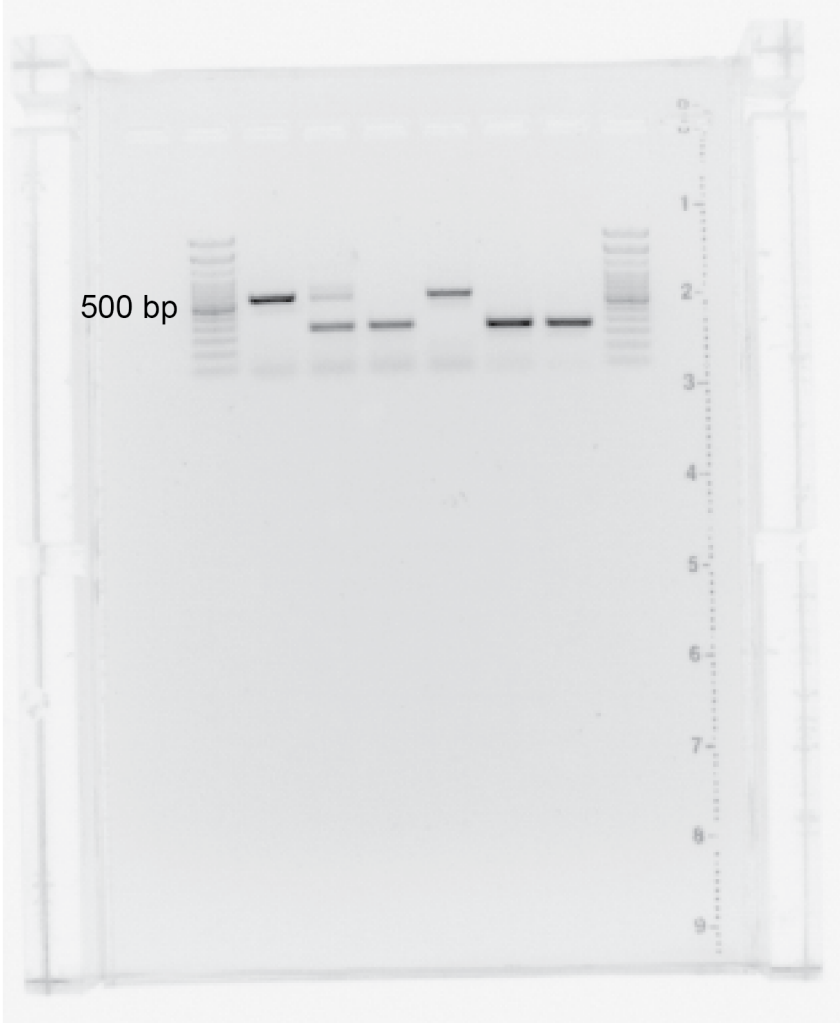

Supplement: 41588_2023_1399_MOESM18_ESM.pdf [file 41588_2023_1399_MOESM18_ESM.pdf]
