# Supplementary material for: Triplication of the interferon receptor locus contributes to hallmarks of Down syndrome in a mouse model
Source: PubMed Central journal article supplement (PMC10260402; doi:10.1038/s41588-023-01399-7), 2023-06-05

# Gapdh

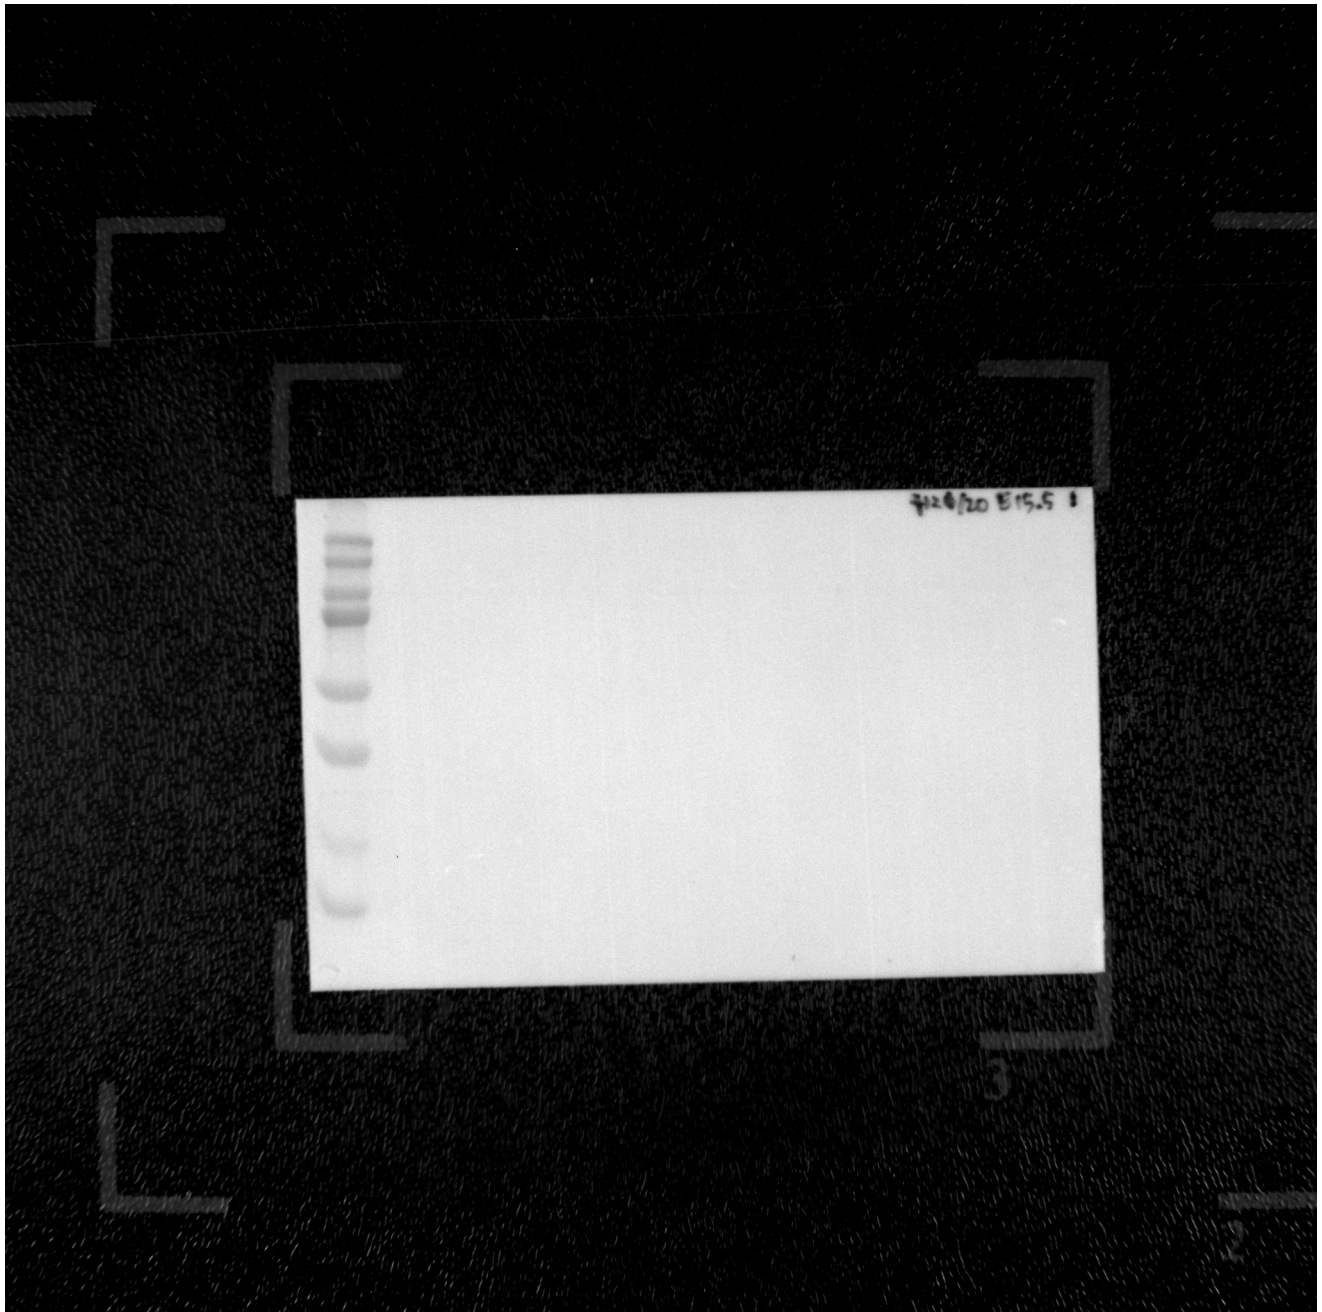

Gapdh

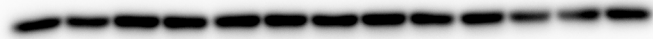

# Gapdh

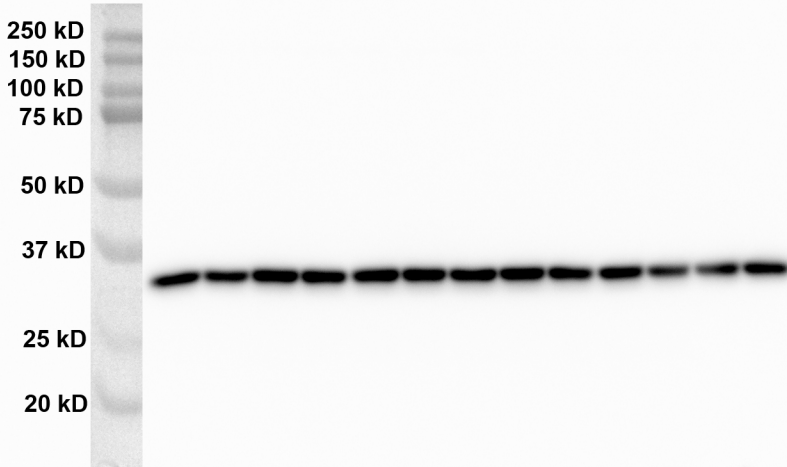

pStat1

1 5519 02/02/14

1110 3 3 3 3



pStat1

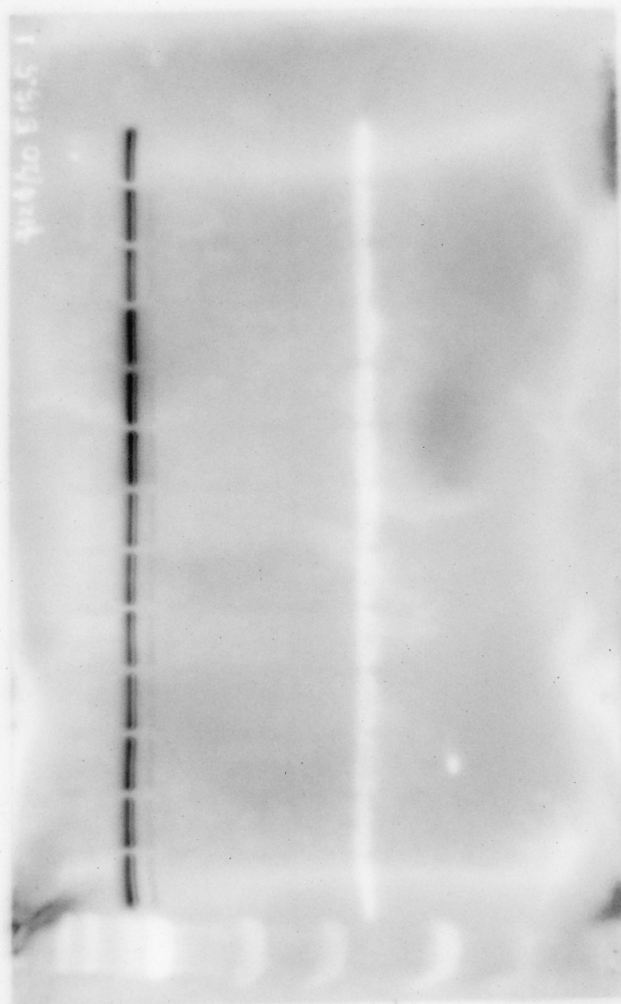

pStat1

250 kD  
150 kD  
100 kD  
75 kD  
50 kD  
37 kD  
25 kD  
20 kD

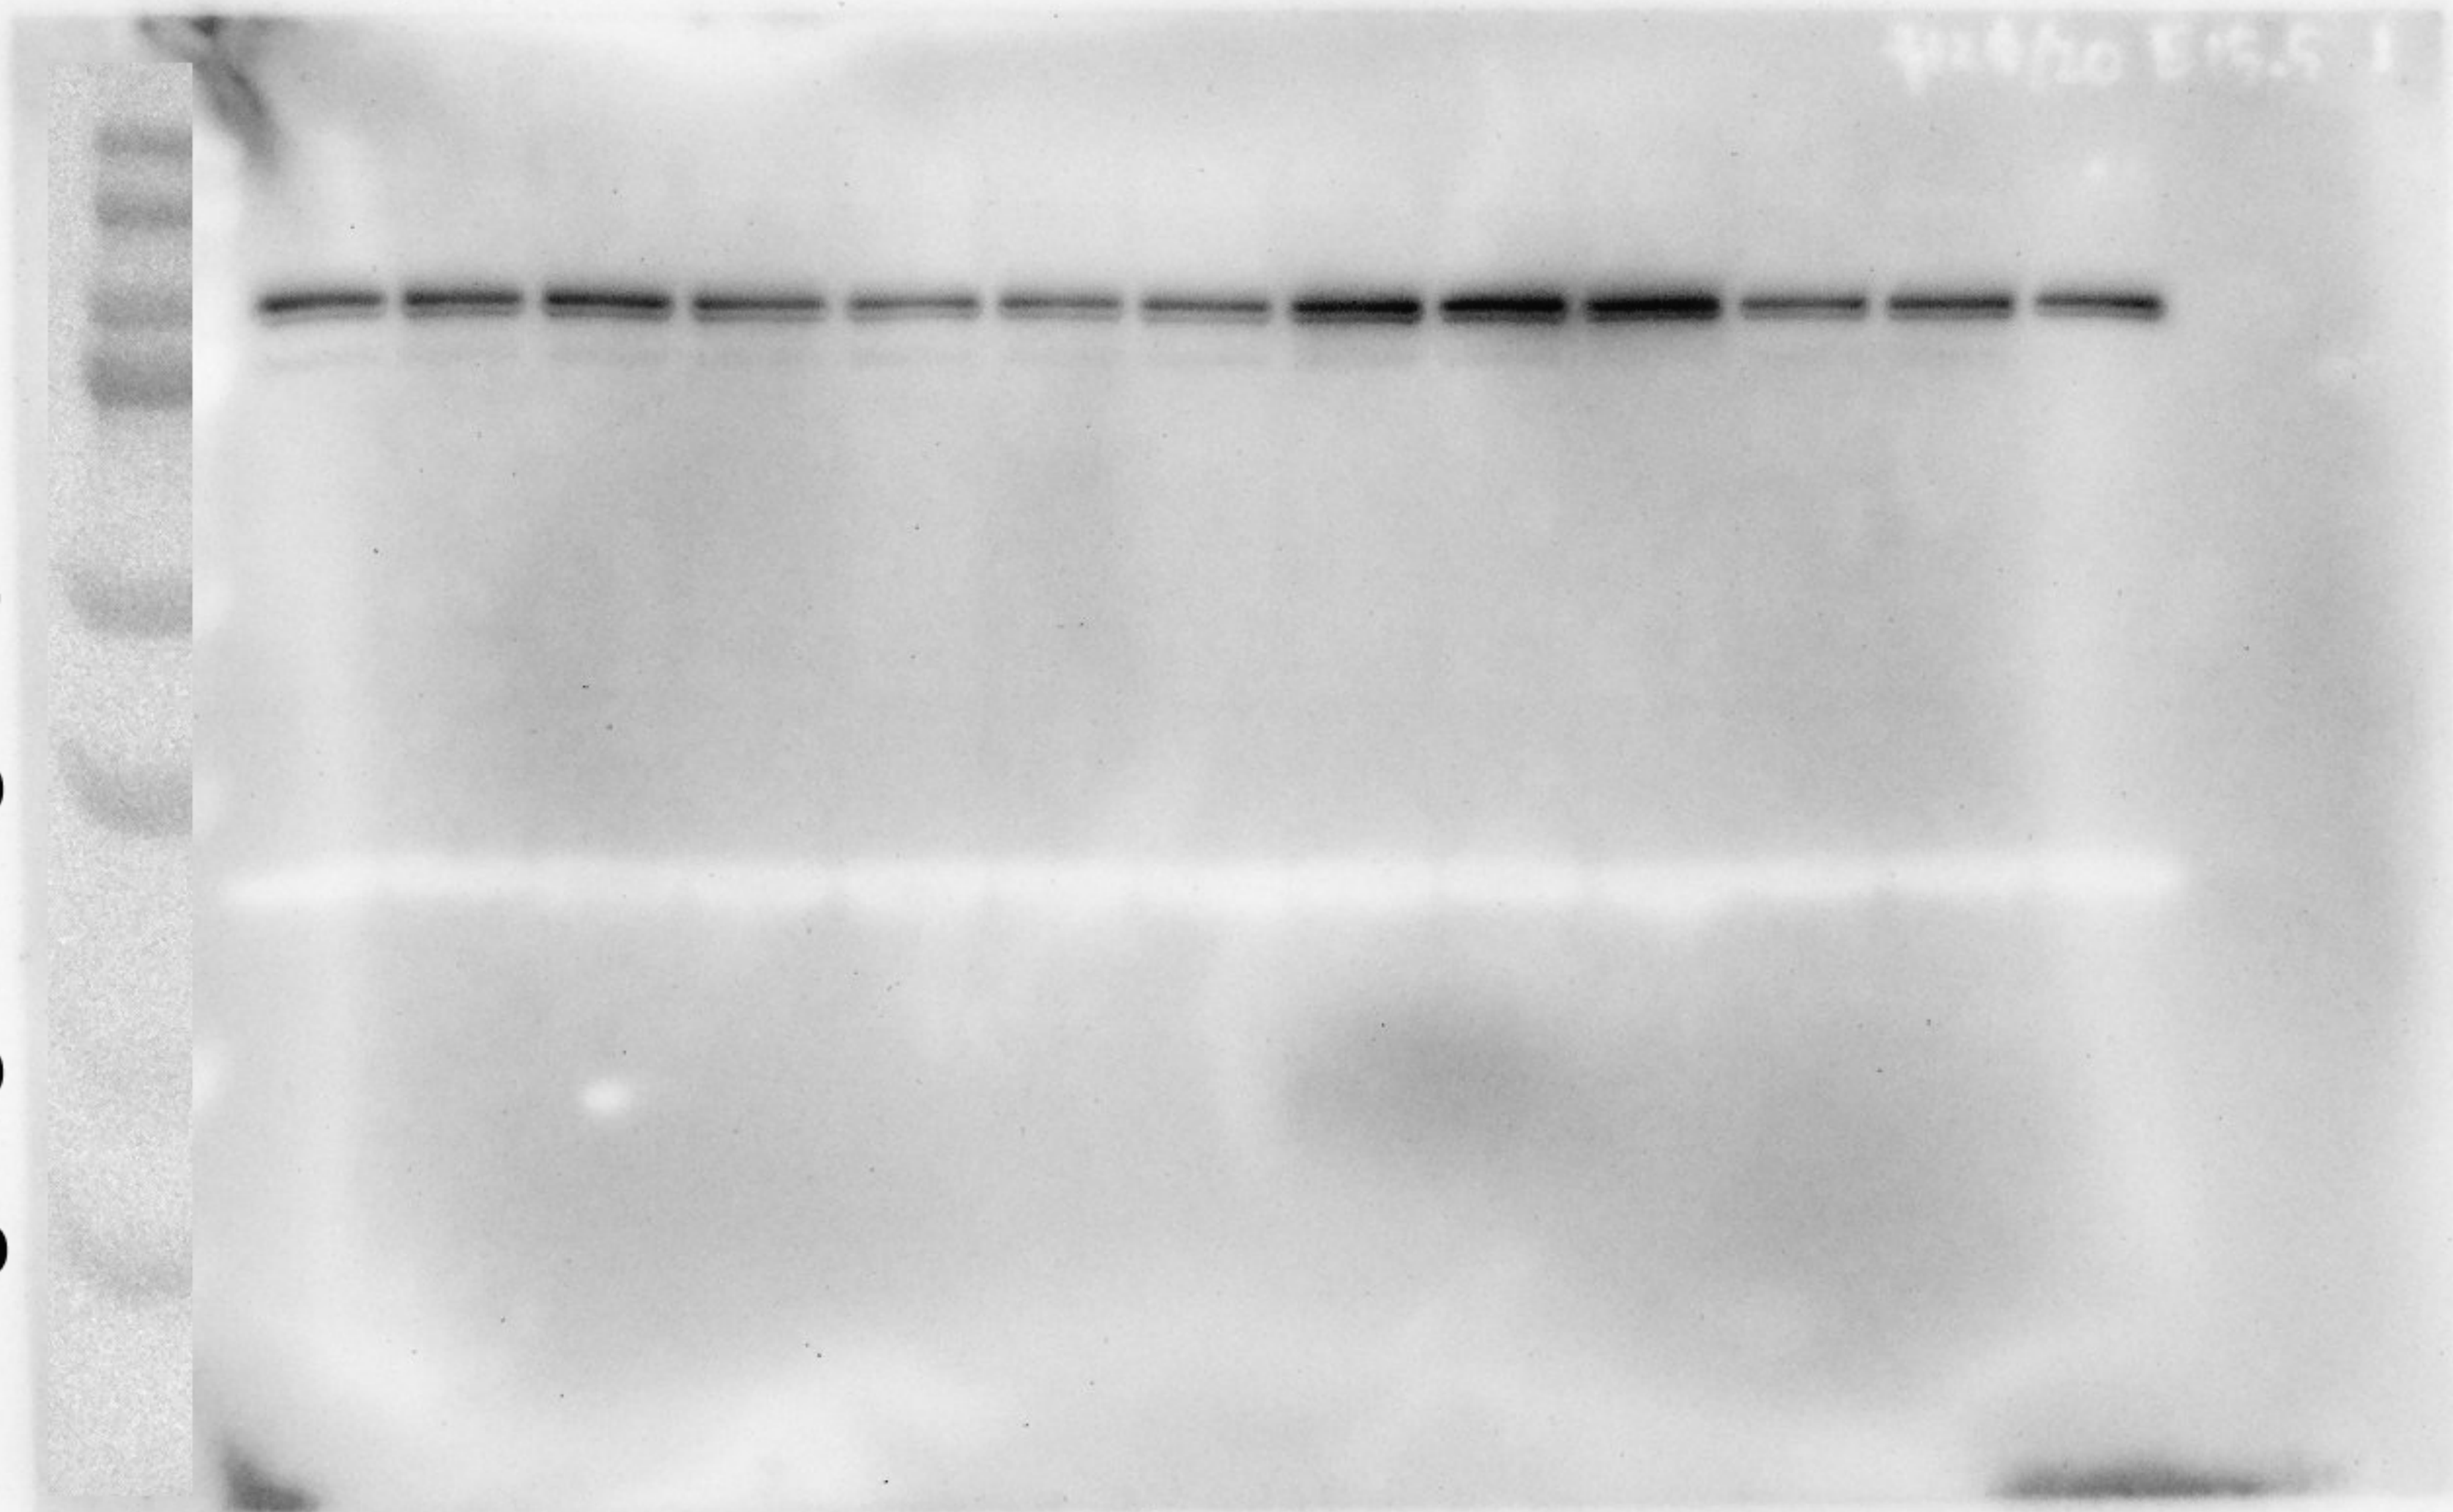

Stat1

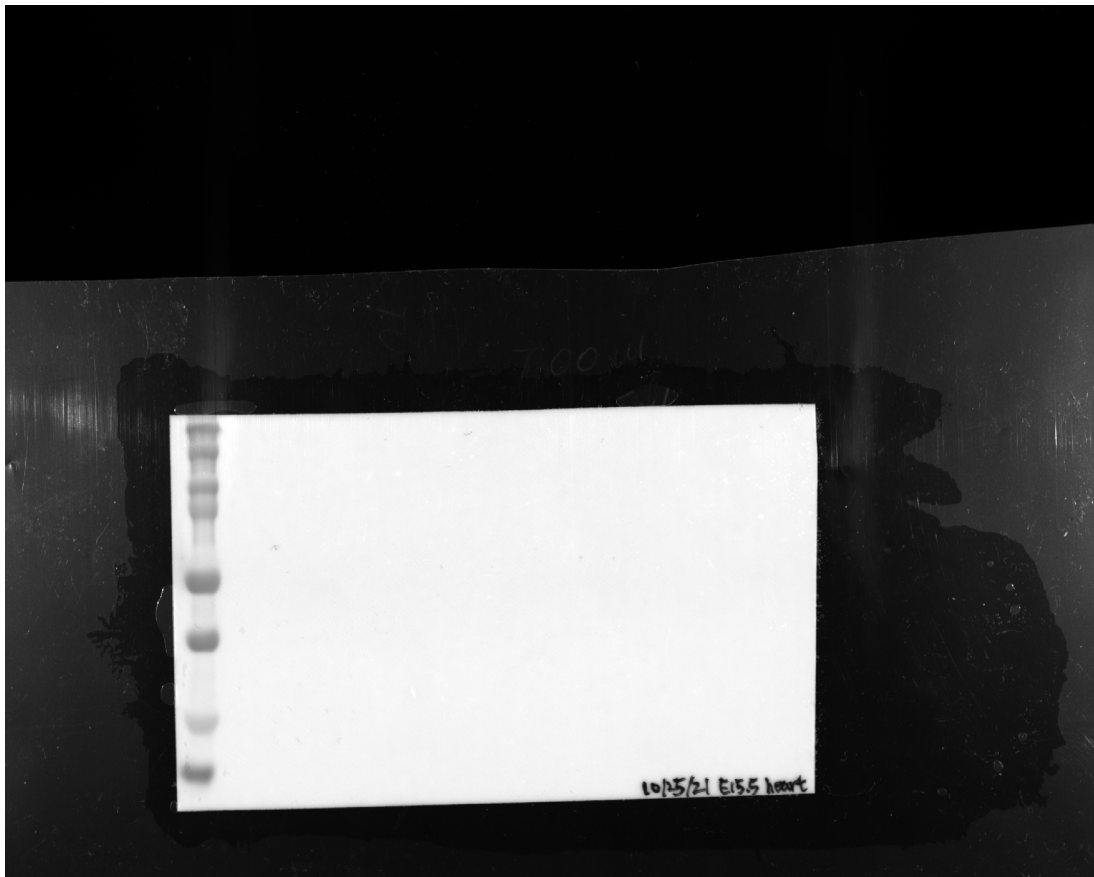

Stat1

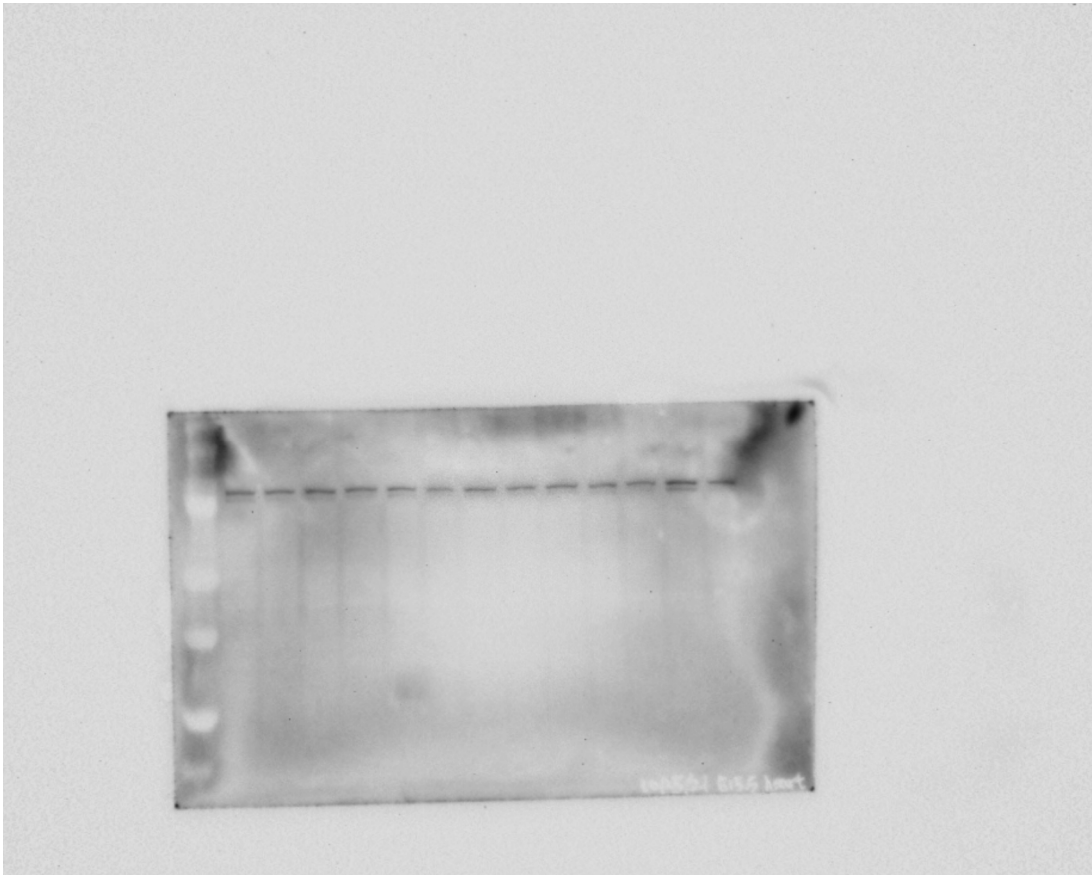

# Stat1

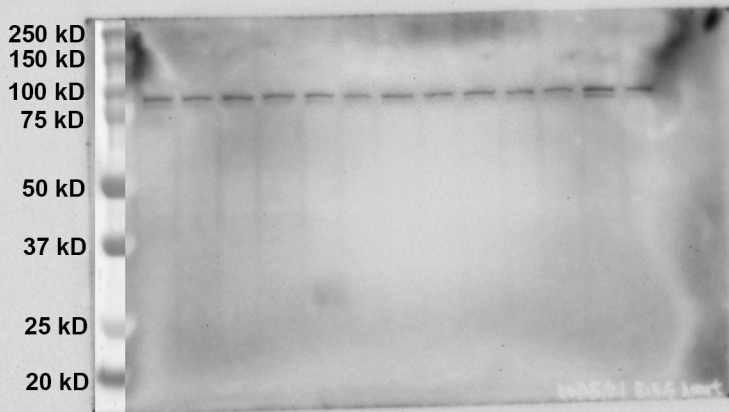

Supplement: 41588_2023_1399_MOESM21_ESM.pdf [file 41588_2023_1399_MOESM21_ESM.pdf]
